# Supplementary material
Source: Springer Nature journal article supplement (https://www.springermedizin.de/resource/supplementary/13011_2012_222_MOESM2_ESM.pdf/9628644)

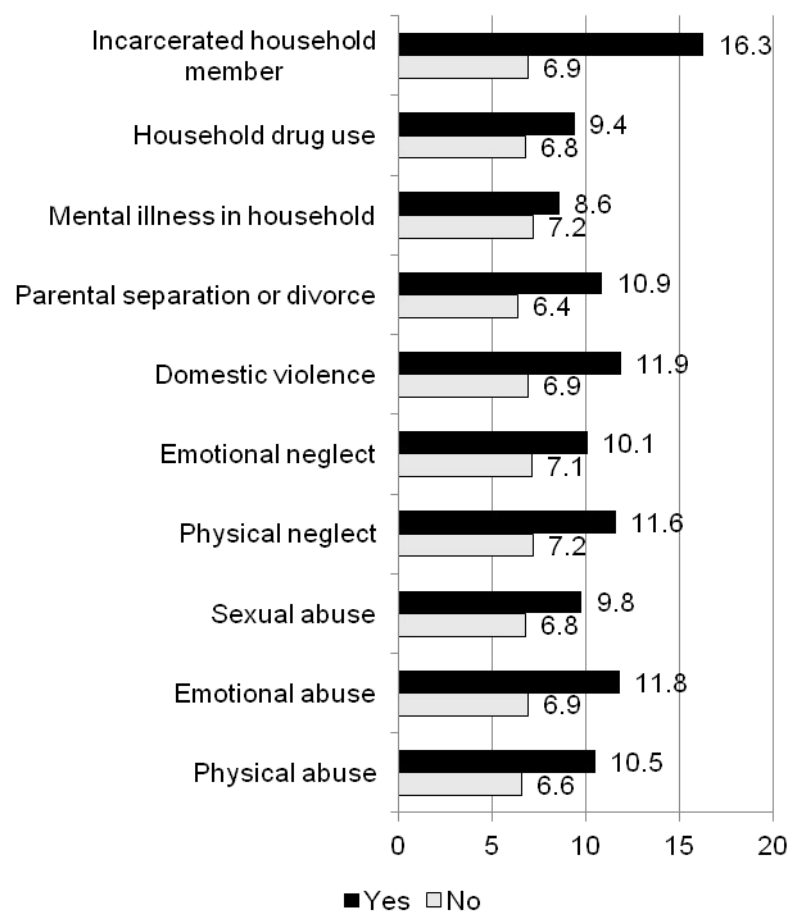

Women

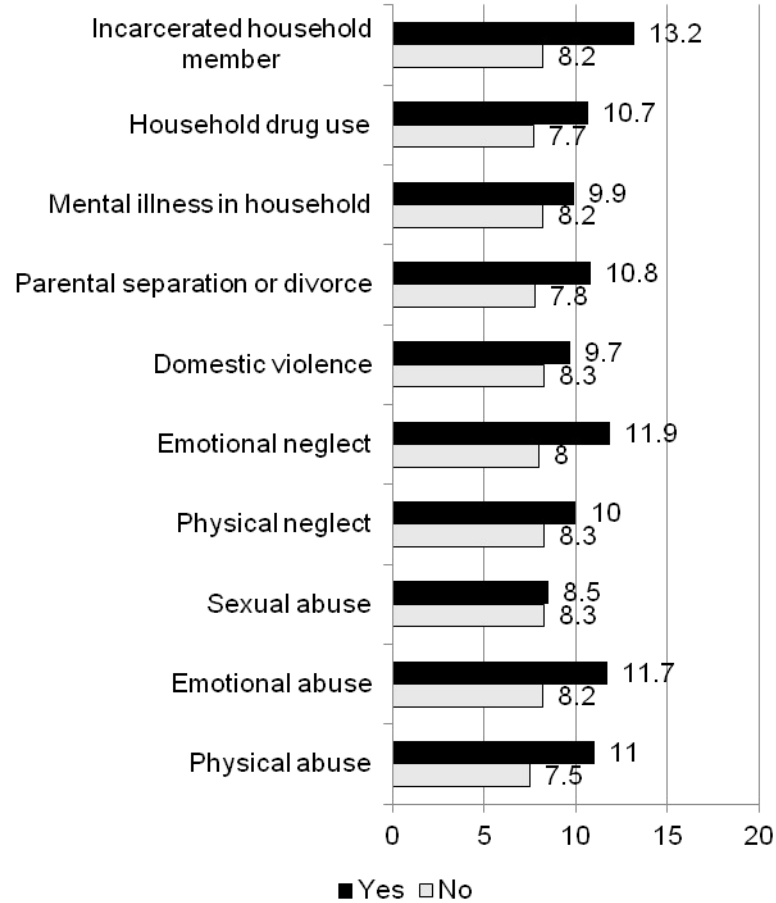

Men

Supplement: MOESM2 [file 9628644]
